# Supplementary material
Source: publisher figshare collection journal article supplement (https://frontiersin.figshare.com/ndownloader/files/26200214)
Supplement: Supplementary file [file 26200214]

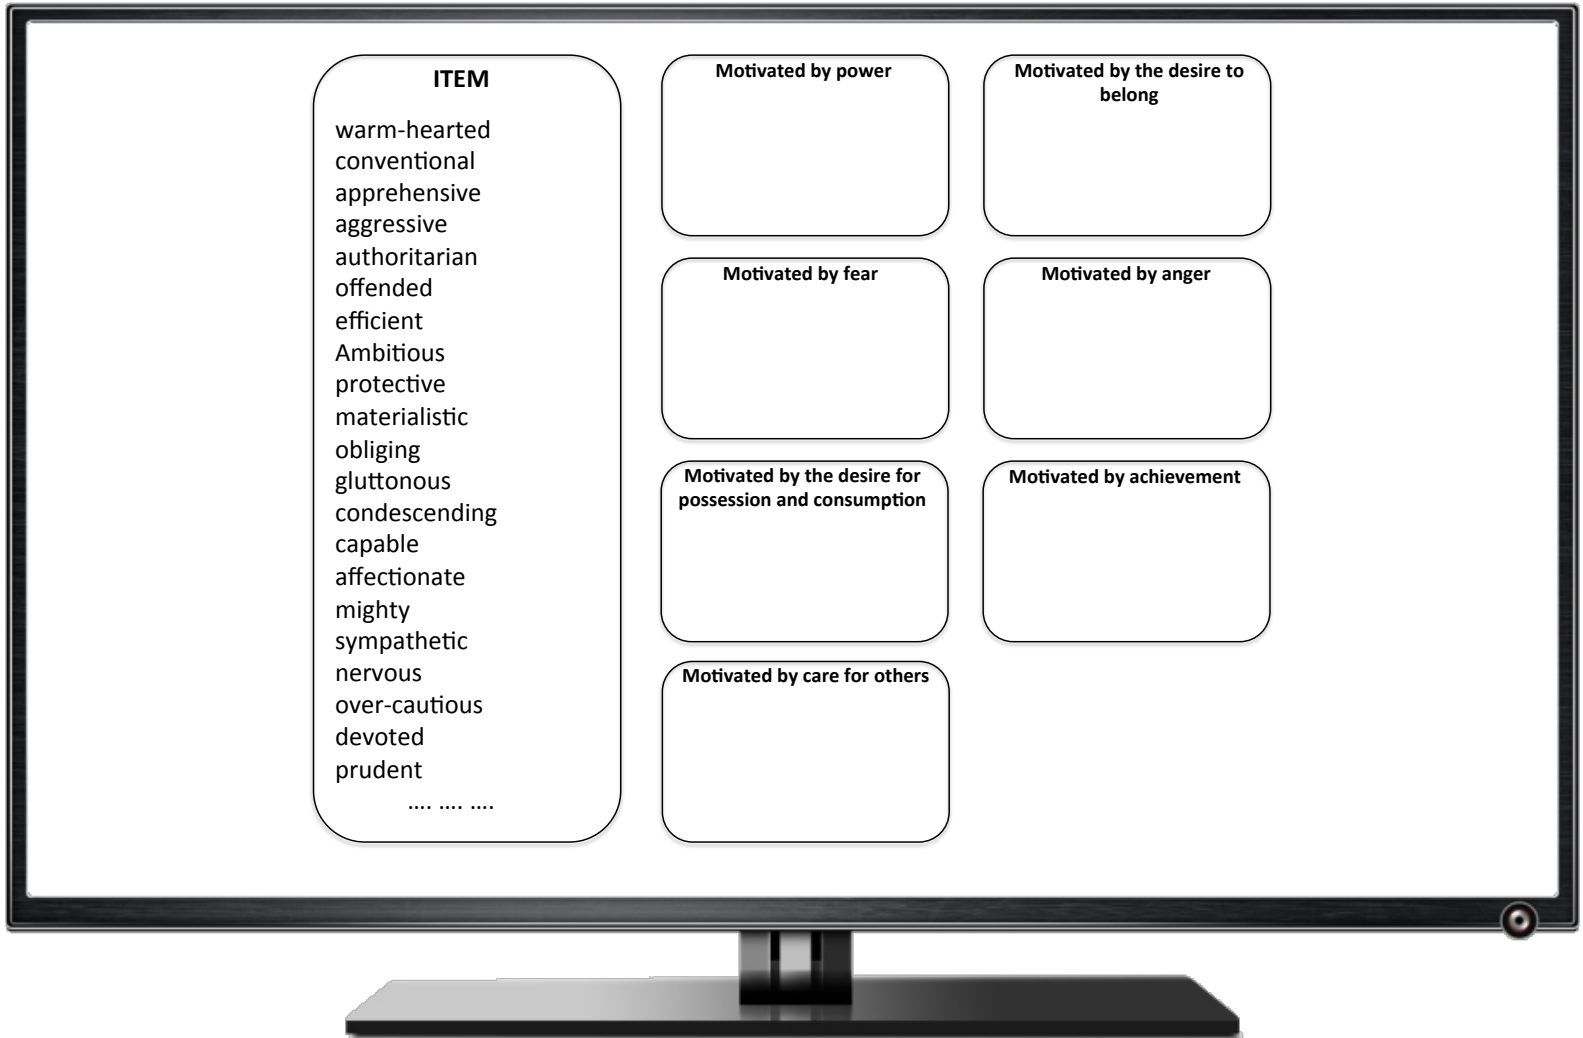

**ITEM**

warm-hearted  
conventional  
apprehensive  
aggressive  
authoritarian  
offended  
efficient  
Ambitious  
protective  
materialistic  
obliging  
gluttonous  
condescending  
capable  
affectionate  
mighty  
sympathetic  
nervous  
over-cautious  
devoted  
prudent

.... .... ....

**Motivated by power**

**Motivated by the desire to belong**

**Motivated by fear**

**Motivated by anger**

**Motivated by the desire for possession and consumption**

**Motivated by achievement**

**Motivated by care for others**

**Supplementary figure 1:** Example screen display during the semantic categorization task. Participants were shown a list of either 174 or 304 words (random order) on the left and were asked to drag and drop each of the words into one of the seven boxes on the right. Each of the boxes represented one of the seven postulated motives. There were no further instructions regarding time limit or number of words that should be sorted into the boxes.
